# Supplementary material for: Inequality persists in a large citizen science programme despite increased participation through ICT innovations
Source: PubMed Central journal article supplement (PMC10692043; doi:10.1007/s13280-023-01917-1), 2023-09-14
Supplement: 13280_2023_1917_MOESM1_ESM.pdf [file 13280_2023_1917_MOESM1_ESM.pdf]

***Ambio***

Electronic Supplementary material

**Title: Inequality persists in a large citizen science programme despite increased participation through ICT innovations**

Authors: Mari Jönsson, Dick Kasperowski, Stephen James Coulson, Johan Nilsson, Pavel Bína, Christopher Kullenberg, Niclas Hagen, René van der Wal, Jesse Peterson

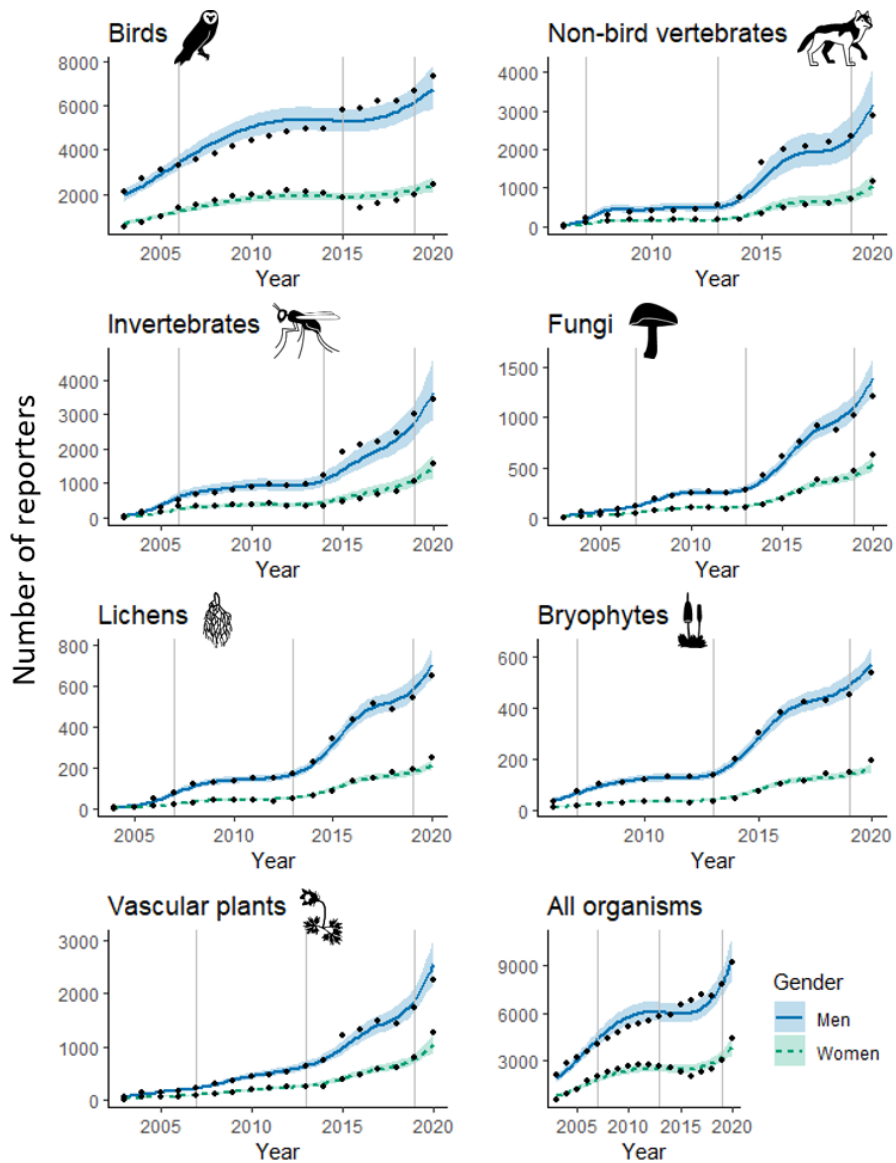

**Figure S1.** Estimated yearly number of men and women reporting for each species group (black dots represent raw data). Trends (with 95 % confidence intervals) are predicted values estimated from the generalized additive models. Vertical lines indicate times when new ICT developments were introduced (see Table 1 in main manuscript). Note that the scales of the y-axes differ.

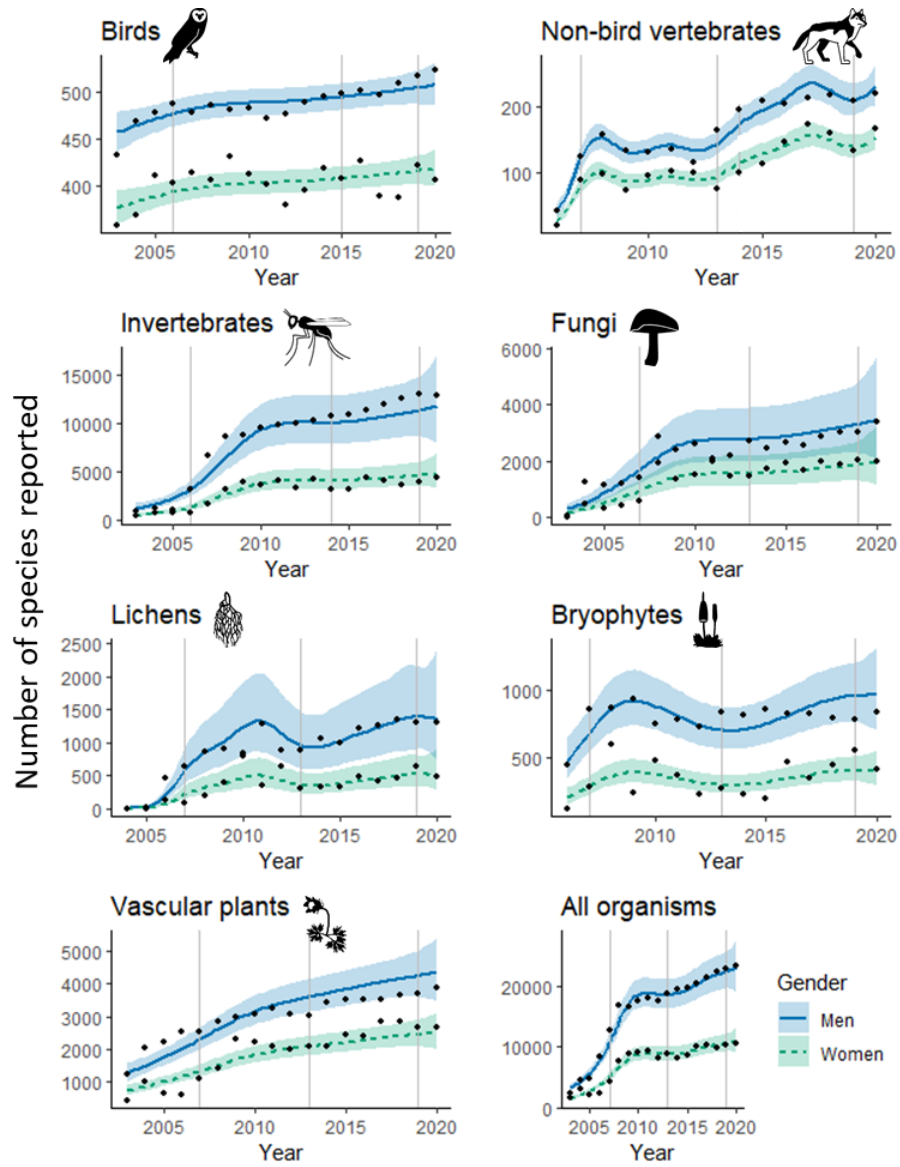

**Figure S2.** Estimated yearly number of unique species reported by men and women (black dots represent raw data). Trends (with 95 % confidence intervals) are predicted values estimated from the generalized additive models. Vertical lines indicate times when new ICT developments were introduced (Table 1 in main manuscript). Note that the scales of the y-axes differ.

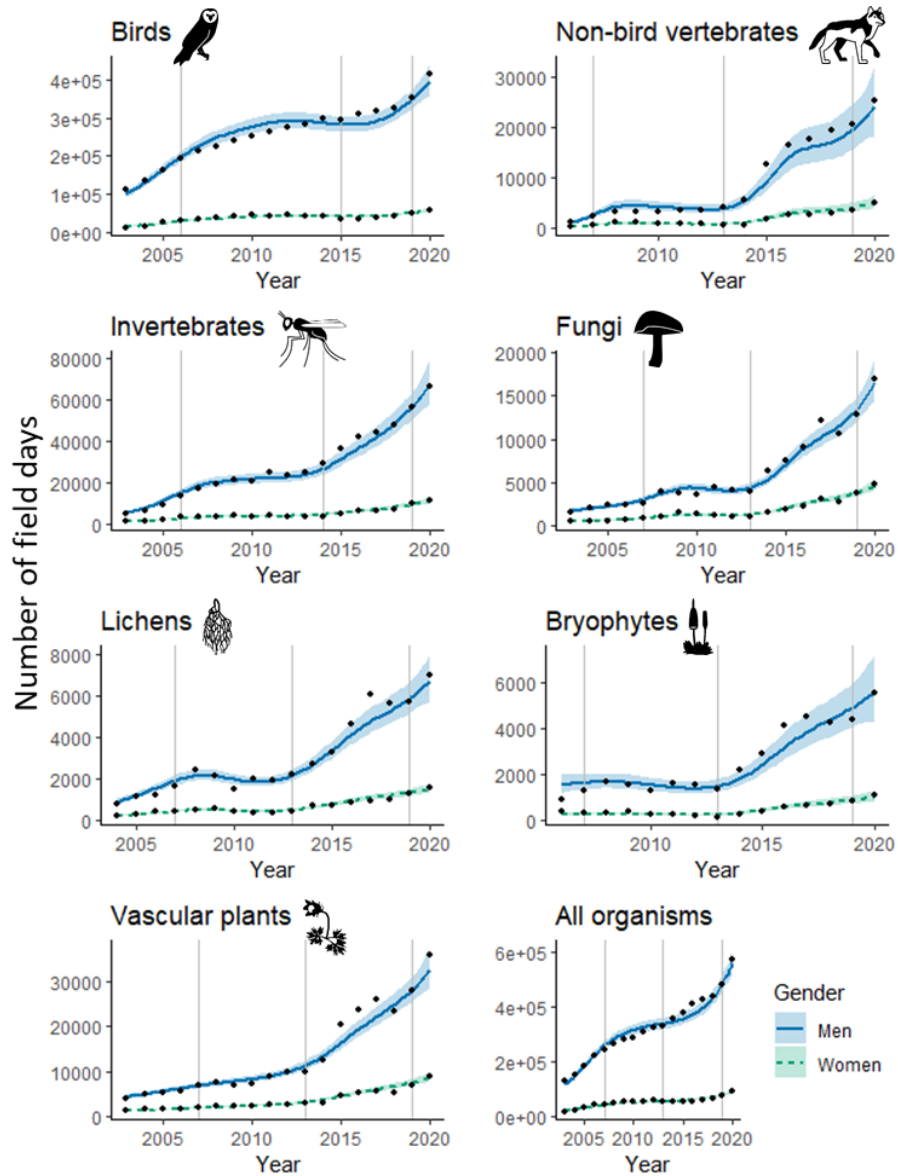

**Figure S3.** Estimated yearly number of days spent in the field by men and women (black dots represent raw data). Trends (with 95 % confidence intervals) are predicted values estimated from the generalized additive models. Vertical lines indicate times when new ICT developments were introduced (Table 1 in main manuscript). Note that the scales of the y-axes differ.

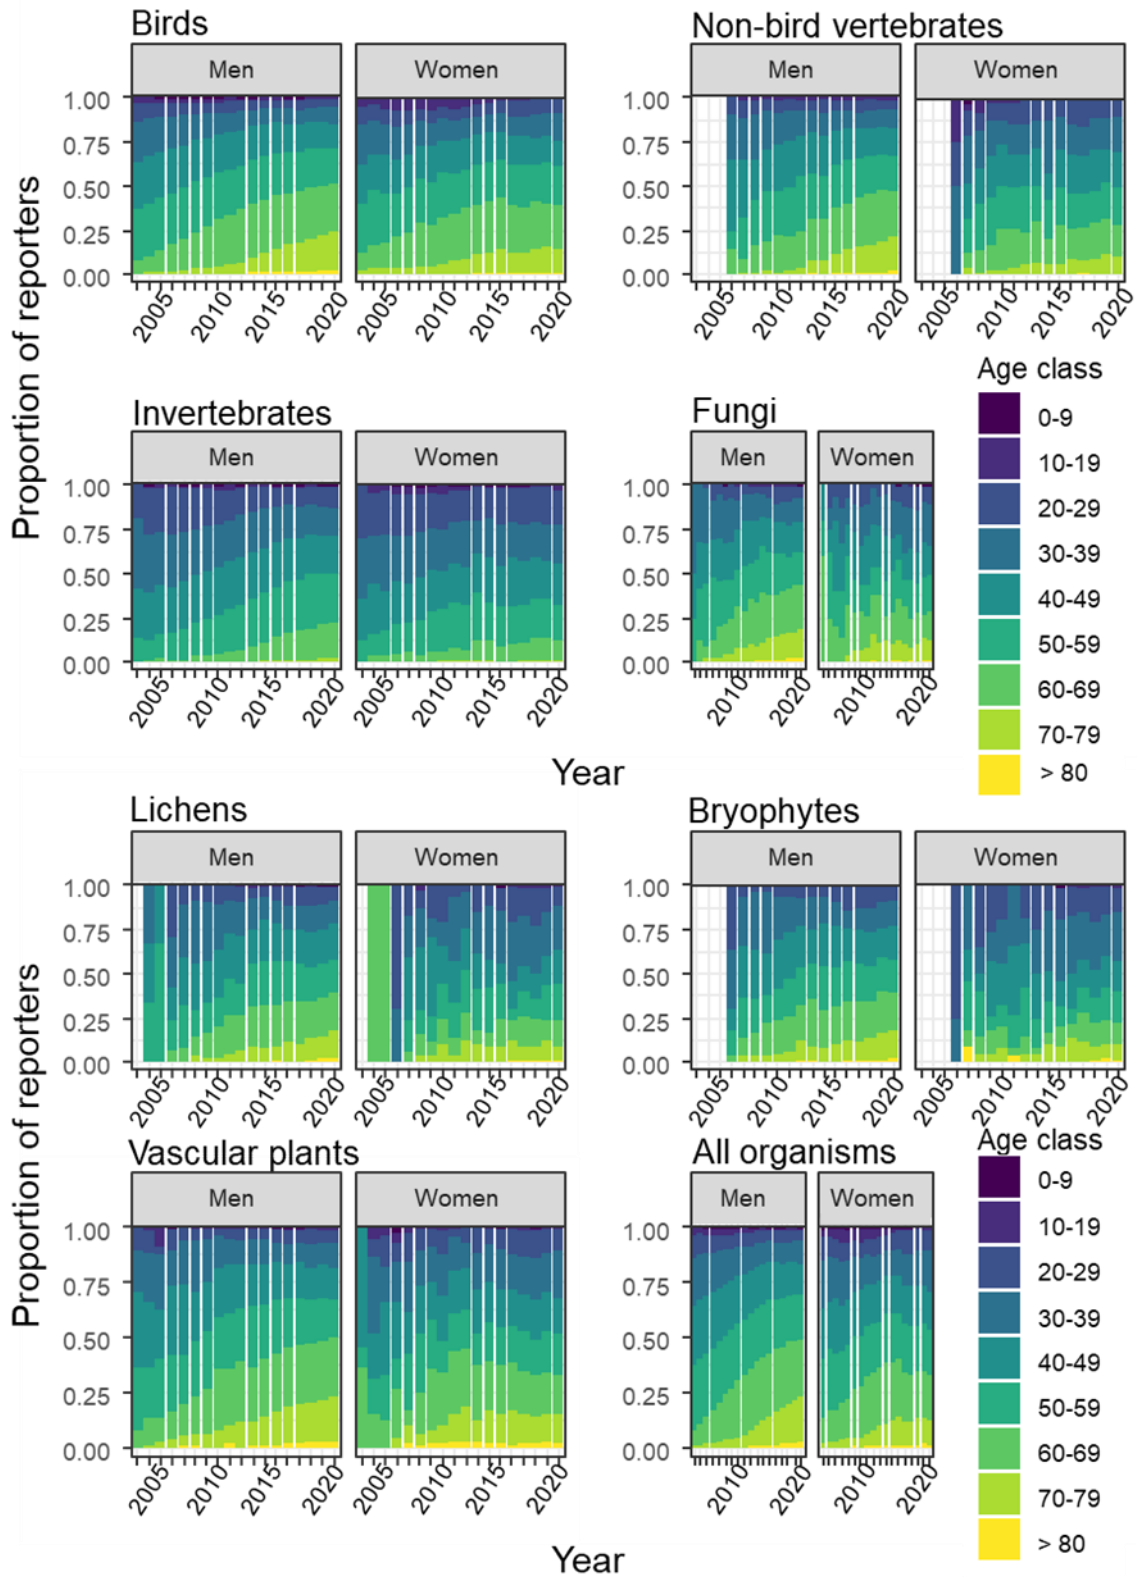

**Figure S4.** Age-class distribution of men and women reporting birds, non-bird vertebrates, invertebrates, fungi, lichens, bryophytes, vascular plants and all organisms to Artportalen 2003-2020.

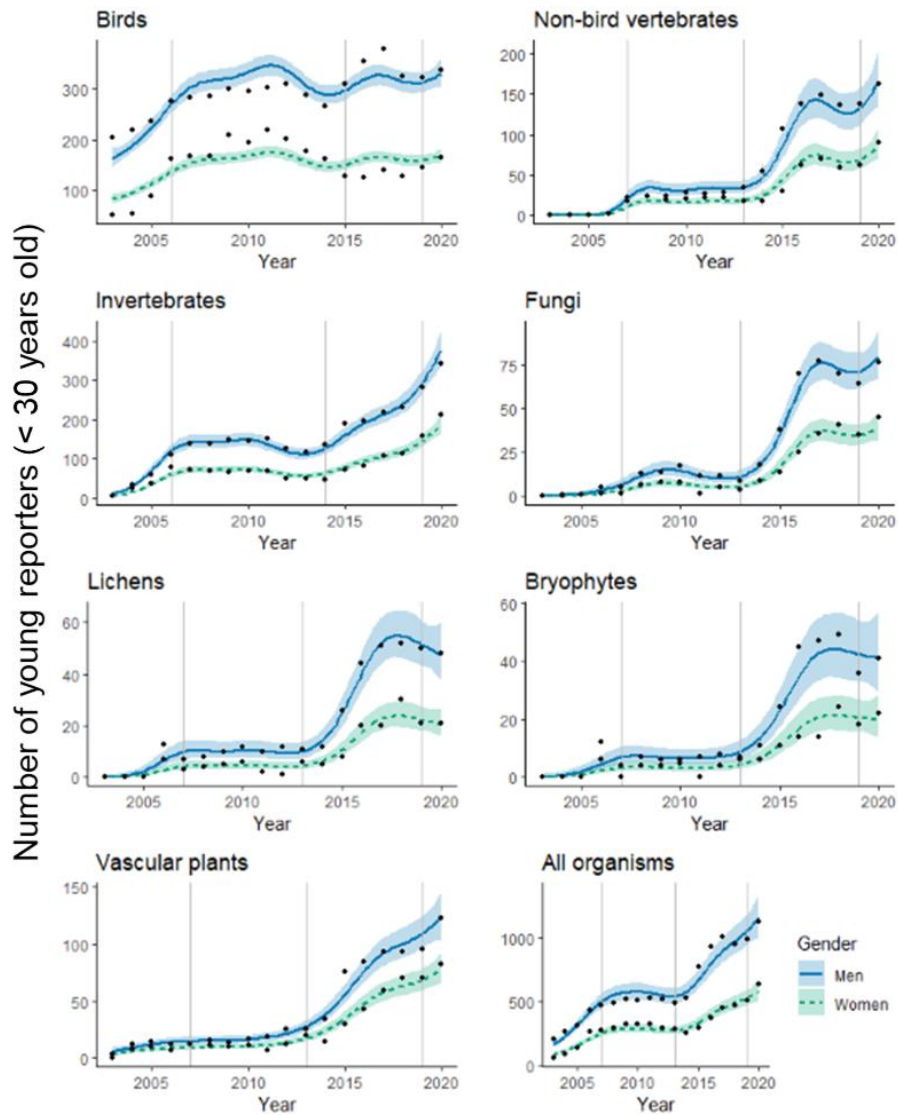

**Figure S5.** Estimated yearly number of young (< 30 years old) men and women reporting for each species group (black dots represent raw data). Trends (with 95 % confidence intervals) are predicted values estimated from the generalized additive models. Vertical lines indicate times when new ICT developments were introduced (see Table 1 in main manuscript). Note that the scales of the y-axes differ.

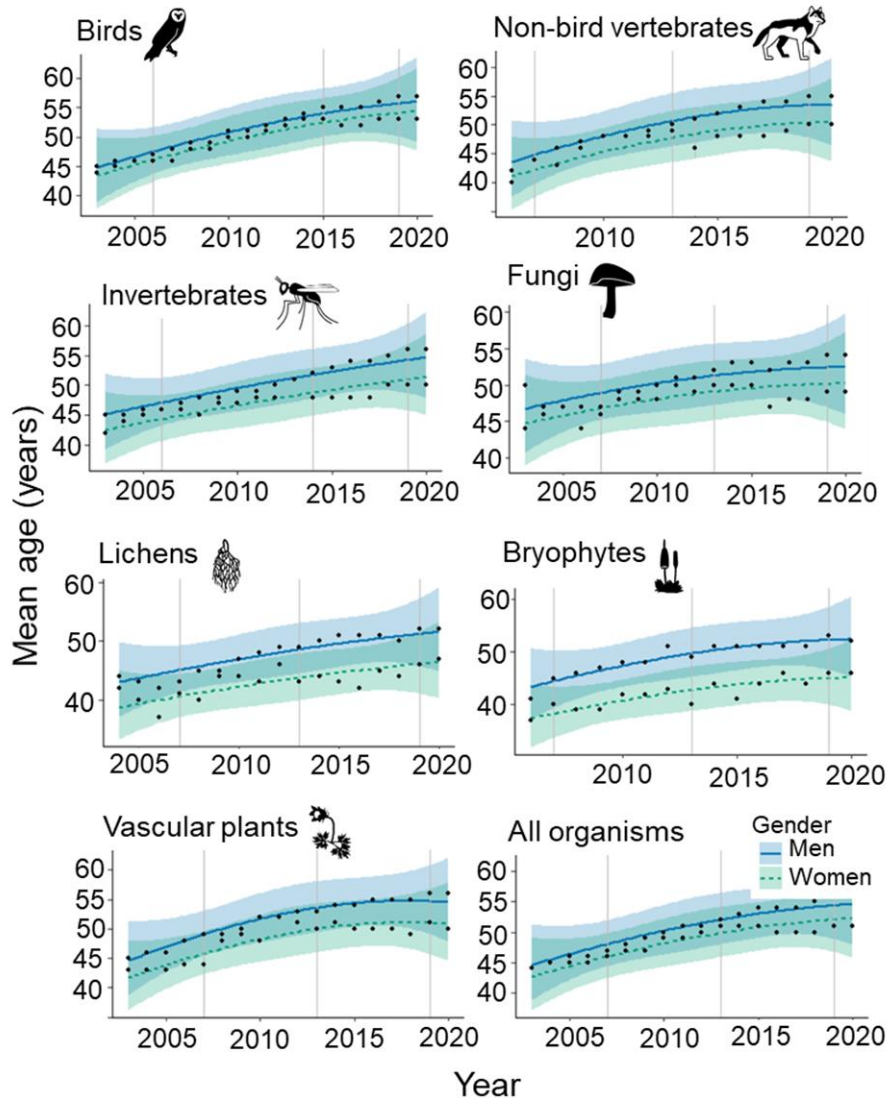

**Figure S6.** Estimated yearly mean reporter age of men and women (black dots represent raw data). Trends (with 95 % confidence intervals) are predicted values estimated from the generalized linear models. Vertical lines indicate times when new ICT developments were introduced (Table 1 in main manuscript). Note that the scales of the y-axes differ slightly.
